# Supplementary material for: Spatially confined FeF3 cathodes in N-doped carbon nanotubes for lithium storage
Source: Royal Society of Chemistry journal article supplement (doi:10.1039/d4cc04960h), 2024-01-01
Supplement: d4cc04960h1.pdf [file d4cc04960h1.pdf]

# **Spatially Confined FeF<sub>3</sub> Cathodes in N-Doped Carbon Nanotubes for Lithium Storage**

Jun Li<sup>a,b</sup>, Xifei Li<sup>a,b,c</sup>\*, Mengyao Li<sup>a,b</sup>, Qinting Jiang<sup>a,b</sup>, Junqian Liu<sup>a,b</sup>, Ruixian Duan<sup>a,b</sup>, Guiqiang Cao<sup>a,b</sup>, Jingjing Wang<sup>a,b</sup>, Wenbin Li<sup>a,b</sup>

*<sup>a</sup> Shaanxi International Joint Research Center of Surface Technology for Energy Storage Materials, Institute of Advanced Electrochemical Energy and School of Materials Science and Engineering, Xi'an University of Technology, Xi'an, China*

*<sup>b</sup> Engineering Research Center of Conducting Materials and Composite Technology, Ministry of Education, Xi'an 710048, China, Key Laboratory of Advanced Batteries Materials for Electric Vehicles of China Petroleum and Chemical Industry Federation, Xi'an University of Technology*

*<sup>c</sup> Guangdong Yuanneng Technologies Co Ltd, Foshan, Guangdong, 528223, China*

E-mail address: xfli2011@hotmail.com

## **Experimental Section:**

### **Preparation of FeF<sub>3</sub>@N-CNTs**

Typically, 1 g of dicyandiamide (DCDA) was dissolved in 30 mL of deionized water, stirred for 15 min, and then 200 mg ferric chloride (FeCl<sub>3</sub>) was added into the above aqueous solution and stirred for 2 h to obtain a homogenous solution. The water was evaporated by heating the mixture at 80 °C under stirring in a water bath to produce the DCDA-Fe composite cluster. In the second step, the powder was heated under an Ar atmosphere at 800 °C for 2 h with a heating rate of 5 °C min<sup>-1</sup> to obtain Fe<sub>3</sub>C@N-CNTs. The FeF<sub>3</sub>@N-CNTs was produced by fluorination of Fe<sub>3</sub>C@N-CNTs at 300 °C for 2 h under Ar/NF<sub>3</sub> mixture gas (Ar/NF<sub>3</sub> volume ratio of 9:1). After cooling naturally, the final product of FeF<sub>3</sub>@N-CNTs was immediately transferred into a glovebox to avoid air exposure.

### **Material Characterizations**

The crystal and morphology structure were analyzed using X-ray diffraction (XRD, Rigaku SmartLab) with Cu K $\alpha$  radiation, scanning electron microscopy (SEM, ZEISS, MERLIN Compact) and transmission electron microscopy (TEM, JEOL JEM-2100Plus) equipped with an energy-dispersive X-ray spectroscopy (EDS). The FeF<sub>3</sub> content was measured by thermogravimetric analysis (TGA, SDT Q600) in air flow under a heating rate of 10 °C·min<sup>-1</sup>. The surface chemical states were analyzed by X-ray photoelectron spectroscopy (XPS, Thermo Fisher Scientific K-Alpha). The specific surface area and pore size distribution of the sample were studied using an Brunauer-Emmett-Teller method (BET, ASAP 2460). Raman spectra (Thermal Scientific DXR) were measured with a 532 nm laser.

### **Electrochemical Measurements**

The FeF<sub>3</sub>@N-CNTs and bare FeF<sub>3</sub> cathodes were prepared by mixing composite materials, acetylene black, and polyvinylidene fluoride with a weight ratio of 70:15:15 in a certain amount of N-methyl-2-pyrrolidone (NMP). The slurry was coated uniformly on Al foil and vacuum dried at 120 °C for 12 h. Using Celgard 2400 as separator and lithium foil as the counter electrode, the CR2023-type coin cells were

assembled for half-cell testing to evaluate the electrochemical performance. The electrolyte was 1.0 M LiFSI dissolved in a mixture of 1,2-dimethoxyethane (DME) and 1,1,2,2-tetrafluoroethyl-2,2,3,3-tetrafluoropropyl ether (TTE). The average areal mass loading of the FeF<sub>3</sub>@N-CNTs on Al foil was approximately 0.9-1.0 mg cm<sup>-2</sup>. The cell assembly was conducted in an argon-filled glove box (Vigor). The electrochemical performance was tested in the voltage of 1.0-4.0 V on Neware system, The cyclic voltammograms (CV) was measured on CHI660D and electrochemical impedance spectroscopy (EIS) was performed on an electrochemical workstation (PARSTAT MC) from 100 kHz to 0.1 Hz with an amplitude of 5.0 mV.

To estimate the electrochemical kinetics of the materials, the capacitive contribution can be fitted quantitatively using the following equation:

$$i(V) = k_1v + k_2v^{1/2}$$

where  $i(V)$  is the peak current at the potential position of  $V$ ,  $v$  represents the corresponding scan rate, and  $k_1v$  and  $k_2v^{1/2}$  are the current responses corresponding to capacitive contribution and diffusion controlled processes, respectively.

The Li<sup>+</sup> diffusion coefficient ( $D_{Li^+}$ ) was calculated using GITT technique to expound the electrochemical reaction kinetics. The tested electrodes were activated at 0.3 A g<sup>-1</sup> before the GITT tests. The  $D_{Li^+}$  value was calculated from the following equation:

$$D_{Li^+} = \frac{4}{\pi\tau} \left( \frac{m_B V_m}{M_B A} \right)^2 \left( \frac{\Delta E_s}{\Delta E_\tau} \right)^2$$

where  $m_B$ ,  $M_B$ , and  $V_m$  are the mass, molecular weight and molar volume of active material, respectively.  $L$  and  $S$  are the thickness and area of the cathode,  $\Delta E_s$  is the difference between open-circuit voltages after two adjacent relaxation processes, and  $\Delta E_\tau$  is the voltage difference between the beginning and termination during one titration step.

### Scalability and commercial applications of synthetic methods

The synthesis strategy for FeF<sub>3</sub>@N-CNTs can be extended to various transition metal-based composite materials, including Ni-based and Co-based systems. In addition, the gas-solid fluorination technique demonstrates remarkable versatility

beyond the synthesis of Ni-based and Co-based fluorides, it can be effectively applied to fluorinate carbides, nitrides, hydrides, oxides, and pure metal nanoparticles. These results demonstrate that the gas-solid fluorination technique possesses significant flexibility and scalability for future applications. We are currently conducting continuous optimization of both the composite material synthesis and gas-solid fluorination techniques. The development of these technologies will provide essential process engineering support for the potential commercial-scale production of high-energy-density fluoride-based cathode materials.

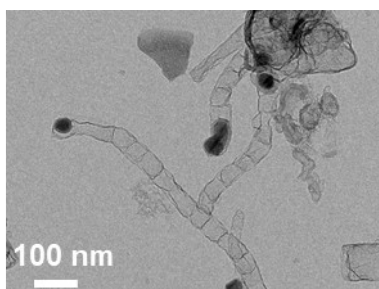

**Fig. S1** The SEM image of Fe<sub>3</sub>C@N-CNTs.

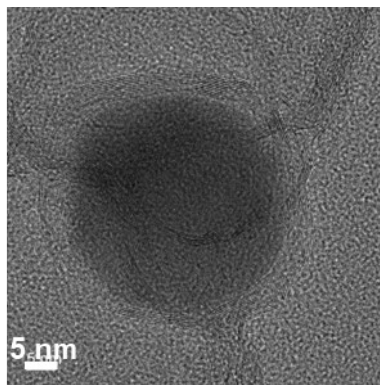

**Fig. S2** The HRTEM image of Fe<sub>3</sub>C@N-CNTs.

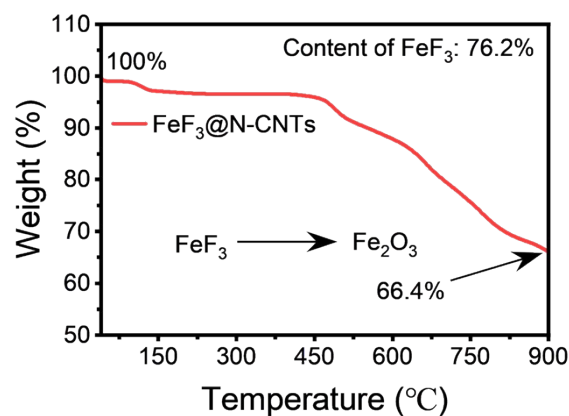

**Fig. S3** TGA result of  $\text{FeF}_3@N\text{-CNTs}$

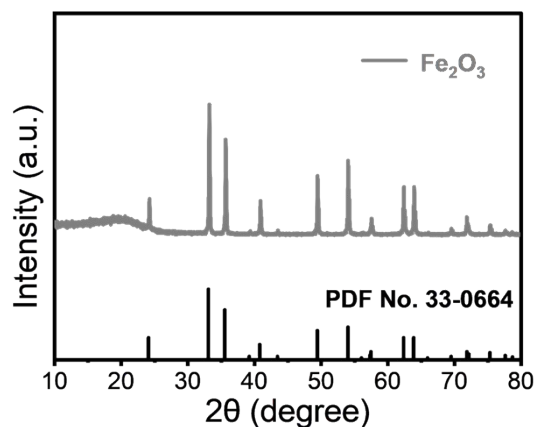

**Fig. S4** XRD pattern of thermogravimetric analysis in air (from  $\text{FeF}_3@N\text{-CNTs}$  to  $\text{Fe}_2\text{O}_3$ )

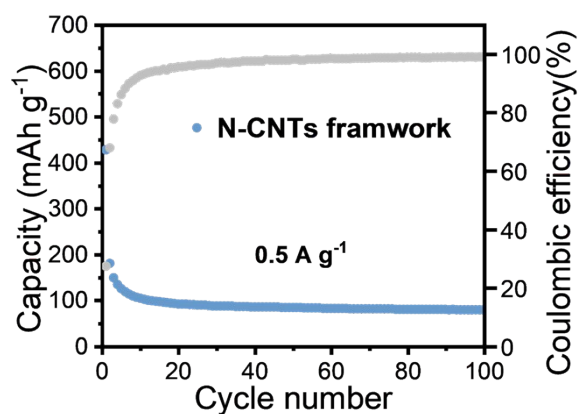

**Fig. S5** Cycling performance of N-CNTs framework at  $0.5 \text{ A g}^{-1}$  after 100 cycles.

To determine the electrochemical capacity contribution of N-CNTs in the  $\text{FeF}_3@N\text{-CNTs}$  composite, the  $\text{FeF}_3@N\text{-CNT}$  composite material is treated with dilute

hydrochloric acid to obtain the N-CNT sample. At a current density of  $0.5 \text{ A g}^{-1}$ , the N-CNT sample without  $\text{FeF}_3$  nanoparticles delivered a specific discharge capacity of only  $78.6 \text{ mAh g}^{-1}$  after 100 cycles, indicating that the high capacity of the composite material mainly depends on the electrochemical reactions of  $\text{FeF}_3$  cathode.

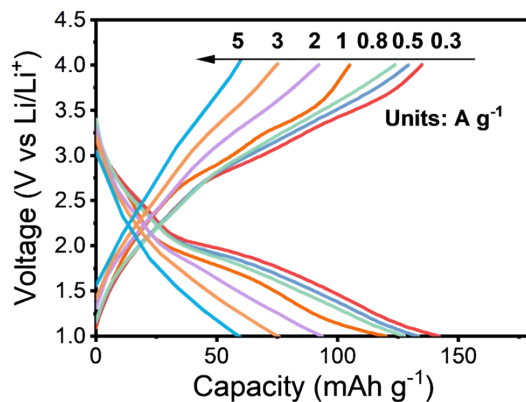

**Fig. S6** Corresponding charge-discharge profiles of bare  $\text{FeF}_3$ .

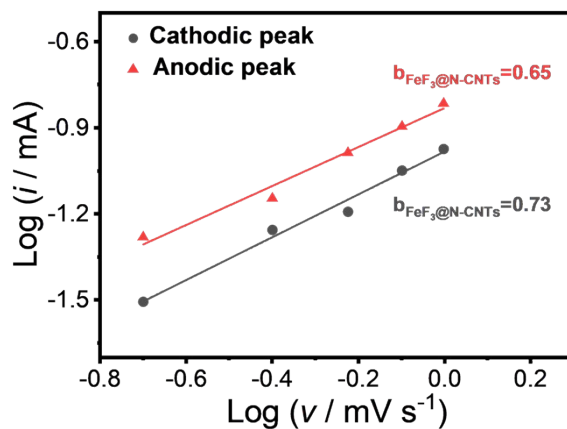

**Fig. S7** Linear relationship of peak currents  $\text{Log}(i)$  versus scan rate  $\text{Log}(v)$  of the  $\text{FeF}_3@\text{N-CNTs}$ .

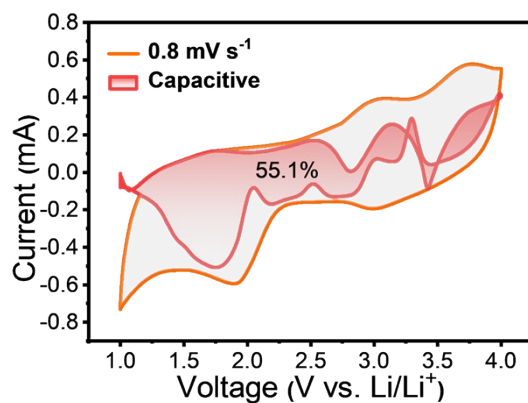

**Fig. S8** CV curve of  $\text{FeF}_3@\text{N-CNTs}$  at  $0.8 \text{ mV s}^{-1}$  (shadow area showing the capacitive contribution).

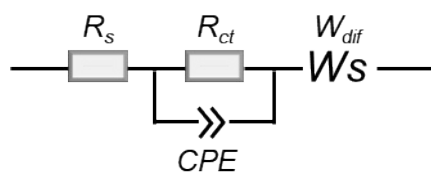

**Fig. S9** The equivalent circuits of corresponding Nyquist plots.

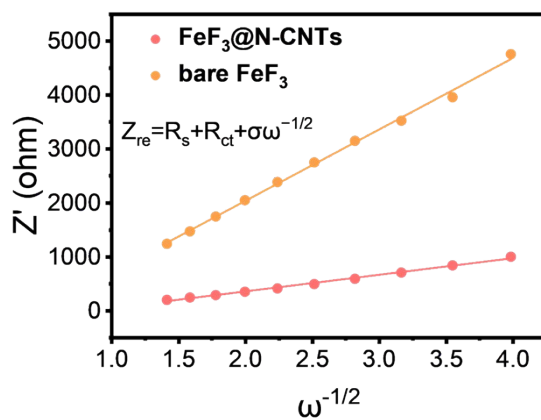

**Fig. S10** Corresponding Nyquist plots of real parts of the complex impedance versus  $\omega^{-1/2}$ .

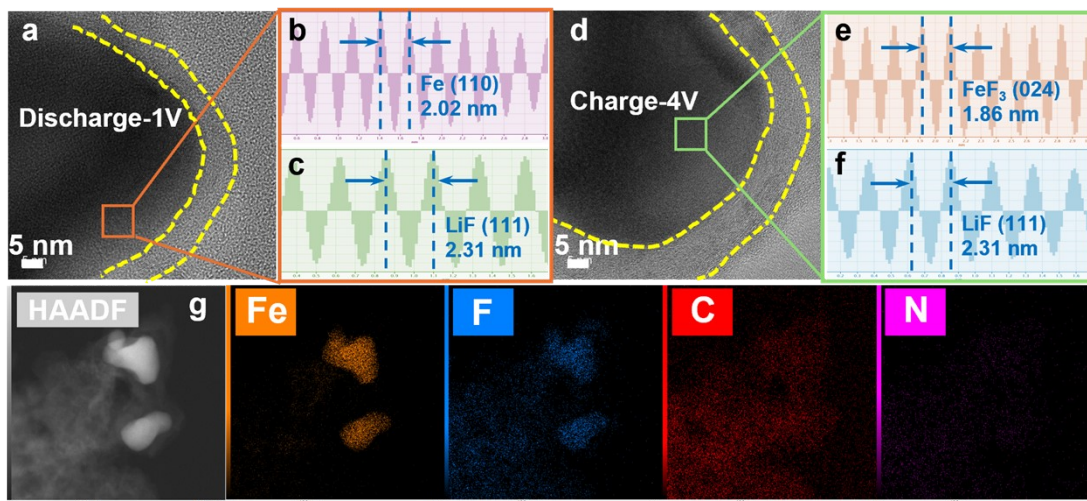

**Fig. S11** (a, d) HRTEM image and corresponding (b-c, e-f) FFT pattern, (g) Elemental mapping images of  $\text{FeF}_3\text{@N-CNTs}$  cathode at different states after 40 cycles.

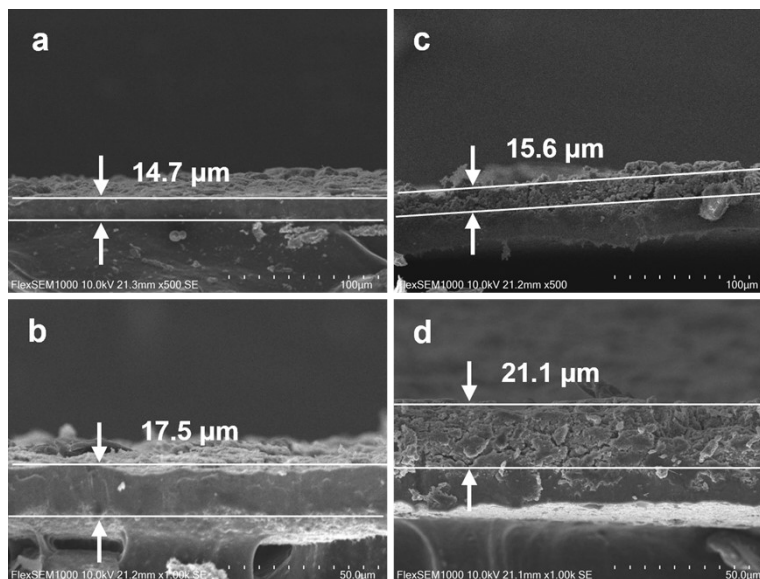

**Fig. S12** Cross-sectional SEM images of (a-b)  $\text{FeF}_3\text{@N-CNTs}$ , (c-d) bare  $\text{FeF}_3$  electrodes before and after lithiation.

Due to significant volume expansion of  $\text{FeF}_3$  particles during lithiation, the electrode structure is susceptible to degradation, which becomes more severe with continued lithiation/delithiation cycles. The specific volume changes can be quantitatively assessed through cross-sectional SEM observations during the lithiated state. From the cross-sectional SEM image in Fig. S12, the thickness of the  $\text{FeF}_3\text{@N-CNTs}$  electrode increases from  $14.7 \mu\text{m}$  to  $17.5 \mu\text{m}$  after 100 cycles, which corresponds



to a 15.9 % increase in thickness (Fig. S12 a-b). As for the FeF<sub>3</sub> electrode, the thickness of the electrode increased from 15.6 μm to 21.1 μm, the thickness increased by 26.1 % (Fig. S12 c-d).

**Table S1** The comparison of battery performance of FeF<sub>3</sub> based materials

| Samples                                                  | Voltage range | Current density (mA g <sup>-1</sup> ) | Specific capacity (mAh g <sup>-1</sup> ) | Cycle number | Ref.                                                  |
|----------------------------------------------------------|---------------|---------------------------------------|------------------------------------------|--------------|-------------------------------------------------------|
| FeF <sub>3</sub> ·0.33H <sub>2</sub> O@C                 | 2-4.2V        | 237                                   | 172.2                                    | 200          | <i>J. Power Sources</i> , <b>2022</b> , 547, 232014.  |
| FeF <sub>3</sub> /C                                      | 2-4.5V        | 20                                    | 126.3                                    | 100          | <i>Electrochim. Acta</i> , <b>2018</b> , 281, 88.     |
| FeF <sub>3</sub> ·0.33H <sub>2</sub> O@HCN               | 2-4.5V        | 23                                    | 162                                      | 1000         | <i>Carbon</i> , <b>2024</b> , 226, 119188.            |
| Co doped FeOF@ACS                                        | 1.2-4V        | 1000                                  | 136                                      | 500          | <i>J. Power Sources</i> , <b>2024</b> , 604: 234510.  |
| Ni/Co dual-doped FeF <sub>3</sub> ·0.33H <sub>2</sub> O  | 1.5-4.5V      | 1000                                  | 177                                      | 400          | <i>Chem. Eng. J.</i> , <b>2023</b> , 451, 138774.     |
| FeF <sub>3</sub> @C                                      | 1.5-4V        | 1000                                  | 210                                      | 400          | <i>Rare Metals</i> , <b>2023</b> , 42, 954.           |
| FeF <sub>3</sub> ·0.33H <sub>2</sub> O@AlPO <sub>4</sub> | 1.2-4V        | 23                                    | 220                                      | 80           | <i>J. Energy Storage</i> , <b>2018</b> , 18, 103.     |
| FeF <sub>3</sub> /C/LiF                                  | 1.5-4.5V      | 40                                    | 240                                      | 50           | <i>J. Electroanal. Chem.</i> , <b>2018</b> , 810, 41. |
| FeF <sub>3</sub> @N-CNTs                                 | 1-4 V         | 2000                                  | 110.6                                    | 5000         | <b>This work</b>                                      |

**Table S2** The corresponding  $R_s$  and  $R_{ct}$  fitted values

|                   | $\text{FeF}_3\text{@N-CNTs}$ | bare $\text{FeF}_3$ |
|-------------------|------------------------------|---------------------|
| $R_s (\Omega)$    | 13.86                        | 13.47               |
| $R_{ct} (\Omega)$ | 60.47                        | 97.35               |
